# Supplementary material for: Bis-phenoxido and bis-acetato bridged heteronuclear {CoIIIDyIII} single molecule magnets with two slow relaxation branches
Source: Royal Society of Chemistry journal article supplement (doi:10.1039/c6dt00848h), 2016-01-01
Supplement: c6dt00848h1.pdf [file c6dt00848h1.pdf]

**Electronic Supplementary Information (ESI)**

**Table S1** Hydrogen bond geometry [ $\text{\AA}$ ,  $^\circ$ ] in **1** and **2**.

| Compound | D-H $\cdots$ A         | H $\cdots$ A | D $\cdots$ A | D-H $\cdots$ A | Symmetry               |
|----------|------------------------|--------------|--------------|----------------|------------------------|
| <b>1</b> | C10-H10 $\cdots$ O9'   | 2.59         | 3.284        | 131.9          | $0.5-x, 0.5+y, 0.5-z$  |
|          | C8-H8B $\cdots$ O11'   | 2.42         | 3.119        | 128.8          | $-0.5+x, 1.5-y, 0.5+z$ |
|          | C7-H7 $\cdots$ O13'    | 2.42         | 3.344        | 172.3          | $-0.5+x, 1.5-y, 0.5+z$ |
|          | C19-H19B $\cdots$ O14  | 2.50         | 3.376        | 150.4          | $1-x, 1-y, -z$         |
|          | C17-H17B $\cdots$ O13  | 2.46         | 3.269        | 141.0          |                        |
| <b>2</b> | C11-H11 $\cdots$ O14'  | 2.55         | 3.214        | 128.7          | $-0.5+x, 1.5-y, 0.5+z$ |
|          | C22-H22A $\cdots$ O13' | 2.61         | 3.369        | 135.7          | $-x, 2-y, -z$          |
|          | C22-H22B $\cdots$ O1'  | 2.59         | 3.391        | 141.0          | $-x, 2-y, -z$          |
|          | C20-H20C $\cdots$ O12' | 2.62         | 3.492        | 151.6          | $0.5+x, 1.5-y, 0.5+z$  |
|          | C7-H7A $\cdots$ O10    | 2.40         | 3.035        | 123.6          |                        |
|          | C14-H14 $\cdots$ O11   | 2.41         | 3.275        | 154.8          | $-1+x, y, z$           |

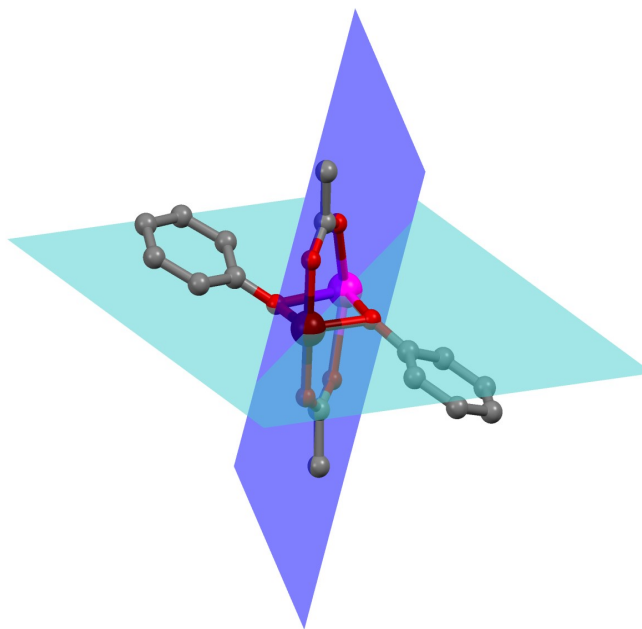

**Fig. S1** Least square  $\text{CoDyO}_2$  (phenoxido) and  $\text{CoDyC}_2\text{O}_4$  (acetato) planes in **1** and **2**.

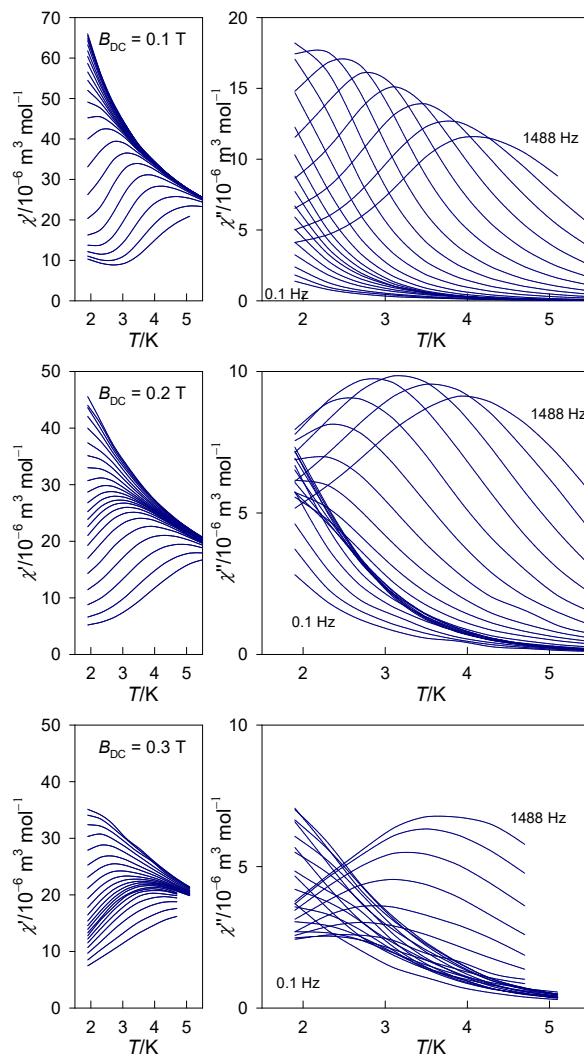

**Fig. S2** Temperature dependence of the AC susceptibility components of **1** for various frequencies  $f = 0.1, 0.16, 0.25, 0.40, 0.63, 1.01, 1.58, 2.51, 3.98, 6.31, 10.01, 15.86, 25.11, 39.81, 63.09, 100.1, 158.4, 251.3, 398.9, 629.2, 997.3$  and  $1488$  Hz.

Fitting of the AC susceptibility data is based upon 44 data points (22 in-phase and 22 out-of phase) using the explicit formulae for the two-component Debye model

a) in phase

$$\chi'(\omega) = \chi_s + (\chi_{T1} - \chi_s) \frac{1 + (\omega\tau_1)^{1-\alpha_1} \sin(\pi\alpha_1/2)}{1 + 2(\omega\tau_1)^{1-\alpha_1} \sin(\pi\alpha_1/2) + (\omega\tau_1)^{2-2\alpha_1}} + (\chi_{T2} - \chi_{T1}) \frac{1 + (\omega\tau_2)^{1-\alpha_2} \sin(\pi\alpha_2/2)}{1 + 2(\omega\tau_2)^{1-\alpha_2} \sin(\pi\alpha_2/2) + (\omega\tau_2)^{2-2\alpha_2}}$$

b) out of phase

$$\chi''(\omega) = (\chi_{T1} - \chi_s) \frac{(\omega\tau_1)^{1-\alpha_1} \cos(\pi\alpha_1/2)}{1 + 2(\omega\tau_1)^{1-\alpha_1} \sin(\pi\alpha_1/2) + (\omega\tau_1)^{2-2\alpha_1}} + (\chi_{T2} - \chi_{T1}) \frac{(\omega\tau_2)^{1-\alpha_2} \cos(\pi\alpha_2/2)}{1 + 2(\omega\tau_2)^{1-\alpha_2} \sin(\pi\alpha_2/2) + (\omega\tau_2)^{2-2\alpha_2}}$$

with the constraint for the isothermal susceptibilities  $\chi_{T1} < \chi_{T2}$  in order to get positive contributions from each primitive component. Seven free parameters can be retrieved reliably by using 44 experimental data points.

The functional to be minimized accounts to the relative errors of both susceptibility components

- $F = w \cdot E(\chi') + (1 - w) \cdot E(\chi'')$  with the typical weight  $w = 0.07$ , or

*Susanta Hazra, Ján Titiš, Dušan Valigura, Roman Boča and Sasankasekhar Mohanta*

- $F = E(\chi') \cdot E(\chi'')$  with

$$E(\chi) = (1/N) \left[ \sum_i^N |(\chi_i^e - \chi_i^c) / \chi_i^c| \right]$$

The optimization routine refers to the genetic algorithm of D. L. Carroll, Univ. Illinois, Urbana, USA, 1998.

The quality of the fit is expressed by

- a) discrepancy factors for the in-phase and out-of phase susceptibilities  $R(\chi')$  and  $R(\chi'')$  defined as

$$R(\chi) = \sqrt{\left[ \sum_i (\chi_i^e - \chi_i^c)^2 \right] / \left[ \sum_i (\chi_i^c)^2 \right]}$$

- b) by the standard deviation for each optimized parameter; this is given in parentheses, e.g. 12.3(45) means  $12.3 \pm 4.5$  (at 95% probability level).

The retrieved parameters should follow a systematic trend along a smooth dependence.

**Table S2** Fitted parameters of the Debye model for **1** at  $B_{\text{DC}} = 0.1$  T.

| $T/\text{K}$ | $R(\chi')$<br>/% | $R(\chi'')$<br>/% | $\chi_s$ | $\chi_{T1}$ | $\alpha_1$ | $\tau_1$<br>/ $10^{-3}$ s | $\chi_{T2}$ | $\alpha_2$ | $\tau_2$<br>/ $10^{-3}$ s |
|--------------|------------------|-------------------|----------|-------------|------------|---------------------------|-------------|------------|---------------------------|
| 1.9          | 0.57             | 2.1               | 8.51(19) | 20.5(12)    | 0.25(4)    | 85.0(100)                 | 66.5(3)     | 0.18(1)    | 2.32(6)                   |
| 2.3          | 0.48             | 1.9               | 7.39(15) | 13.7(6)     | 0.22(5)    | 93.8(100)                 | 56.5(2)     | 0.14(1)    | 1.45(2)                   |
| 2.7          | 0.22             | 2.7               | 7.50(15) | 11.4(4)     | 0.25(7)    | 100(14)                   | 49.0(2)     | 0.09(1)    | 0.871(7)                  |
| 3.1          | 0.33             | 4.1               | 7.50(23) | 9.78(51)    | 0.24(13)   | 125(33)                   | 43.5(2)     | 0.06(1)    | 0.520(6)                  |
| 3.5          | 0.37             | 5.3               | 7.57(34) | 8.85(55)    | 0.19(23)   | 165(74)                   | 38.7(2)     | 0.04(1)    | 0.321(5)                  |
| 3.9          | 0.53             | 1.4               | 6.25(27) | 7.00(36)    | 0.18(20)   | 210(84)                   | 35.3(1)     | 0.05(1)    | 0.194(3)                  |
| 4.3          | 0.19             | 1.8               | 6.50(21) | 6.91(25)    | 0.13(18)   | 263(89)                   | 32.1(1)     | 0.06(1)    | 0.132(2)                  |
| 4.7          | 0.11             | 2.9               | 7.11(36) | 7.37(40)    | 0.13(32)   | 325(207)                  | 29.6(1)     | 0.05(1)    | 0.0956(22)                |
| 5.1          | 0.31             | 0.59              | 7.42(38) | 7.57(40)    | 0.06(38)   | 367(248)                  | 27.4(1)     | 0.04(1)    | 0.0736(19)                |

**Table S3** Fitted parameters of the Debye model for **1** at  $B_{\text{DC}} = 0.2$  T.

| $T/\text{K}$ | $R(\chi')$<br>/% | $R(\chi'')$<br>/% | $\chi_s$ | $\chi_{T1}$ | $\alpha_1$ | $\tau_1$<br>/ $10^{-3}$ s | $\chi_{T2}$ | $\alpha_2$ | $\tau_2$<br>/ $10^{-6}$ s |
|--------------|------------------|-------------------|----------|-------------|------------|---------------------------|-------------|------------|---------------------------|
| 1.9          | 0.85             | 1.5               | 1.09(37) | 26.0(9)     | 0.34(1)    | 100(4)                    | 48.1(3)     | 0.26(2)    | 477(16)                   |
| 2.3          | 0.40             | 1.4               | 0.90(20) | 17.2(5)     | 0.32(1)    | 93.8(26)                  | 42.6(1)     | 0.25(1)    | 437(7)                    |
| 2.7          | 0.28             | 0.86              | 1.40(12) | 12.5(3)     | 0.34(1)    | 87.5(23)                  | 38.1(1)     | 0.19(1)    | 354(3)                    |
| 3.1          | 0.24             | 0.78              | 1.69(11) | 8.72(20)    | 0.34(1)    | 110(3)                    | 34.3(1)     | 0.17(1)    | 272(2)                    |
| 3.5          | 0.22             | 0.92              | 1.50(13) | 5.59(19)    | 0.27(2)    | 146(5)                    | 30.9(1)     | 0.17(1)    | 200(2)                    |
| 3.9          | 0.26             | 0.80              | 1.86(17) | 4.70(23)    | 0.33(3)    | 162(10)                   | 28.3(1)     | 0.14(1)    | 147(2)                    |
| 4.3          | 0.20             | 0.93              | 1.93(19) | 3.78(24)    | 0.34(3)    | 169(14)                   | 25.9(1)     | 0.14(1)    | 107(1)                    |
| 4.7          | 0.18             | 1.1               | 1.38(30) | 2.77(36)    | 0.44(5)    | 177(27)                   | 24.0(1)     | 0.14(1)    | 74.0(16)                  |
| 5.1          | 0.26             | 1.5               | 1.66(59) | 2.77(69)    | 0.50(8)    | 122(35)                   | 22.3(1)     | 0.11(1)    | 54.8(25)                  |
| 5.5          | 0.17             | 1.6               | 1.49(76) | 2.52(90)    | 0.60(9)    | 56.3(227)                 | 20.9(1)     | 0.10(1)    | 39.0(25)                  |

**Table S4** Fitted parameters of the Debye model for **1** at  $B_{\text{DC}} = 0.3$  T.

| $T/\text{K}$ | $R(\chi')$<br>/% | $R(\chi'')$<br>/% | $\chi_s$ | $\chi_{T1}$ | $\alpha_1$ | $\tau_1$<br>/ $10^{-3}$ s | $\chi_{T2}$ | $\alpha_2$ | $\tau_2$<br>/ $10^{-6}$ s |
|--------------|------------------|-------------------|----------|-------------|------------|---------------------------|-------------|------------|---------------------------|
| 1.9          | 0.61             | 2.6               | 0        | 25.4(3)     | 0.36(1)    | 169(3)                    | 38.7(2)     | 0.37(1)    | 82.5(30)                  |
| 2.3          | 0.52             | 2.4               | 0        | 20.4(3)     | 0.35(1)    | 143(3)                    | 36.6(1)     | 0.35(1)    | 88.6(21)                  |
| 2.7          | 0.40             | 2.0               | 0        | 15.5(2)     | 0.36(1)    | 125(3)                    | 34.1(1)     | 0.31(1)    | 84.4(13)                  |
| 3.1          | 0.41             | 2.3               | 0        | 10.9(2)     | 0.34(1)    | 141(4)                    | 31.5(1)     | 0.29(1)    | 80.9(10)                  |
| 3.5          | 0.41             | 2.6               | 0        | 7.35(16)    | 0.31(2)    | 160(6)                    | 29.0(1)     | 0.27(1)    | 68.7(8)                   |
| 3.9          | 0.39             | 2.0               | 0        | 5.10(14)    | 0.32(2)    | 189(9)                    | 26.9(1)     | 0.25(1)    | 57.8(6)                   |
| 4.3          | 0.38             | 2.1               | 0        | 3.54(16)    | 0.38(3)    | 202(17)                   | 24.9(1)     | 0.22(1)    | 46.7(5)                   |
| 4.7          | 0.27             | 2.6               | 0        | 2.94(17)    | 0.46(3)    | 247(33)                   | 23.5(1)     | 0.19(1)    | 37.3(4)                   |
| 5.1          | 0.10             | 2.6               | 0        | 1.53(9)     | 0.31(3)    | 281(16)                   | 21.6(1)     | 0.30(5)    | 25.3(79)                  |

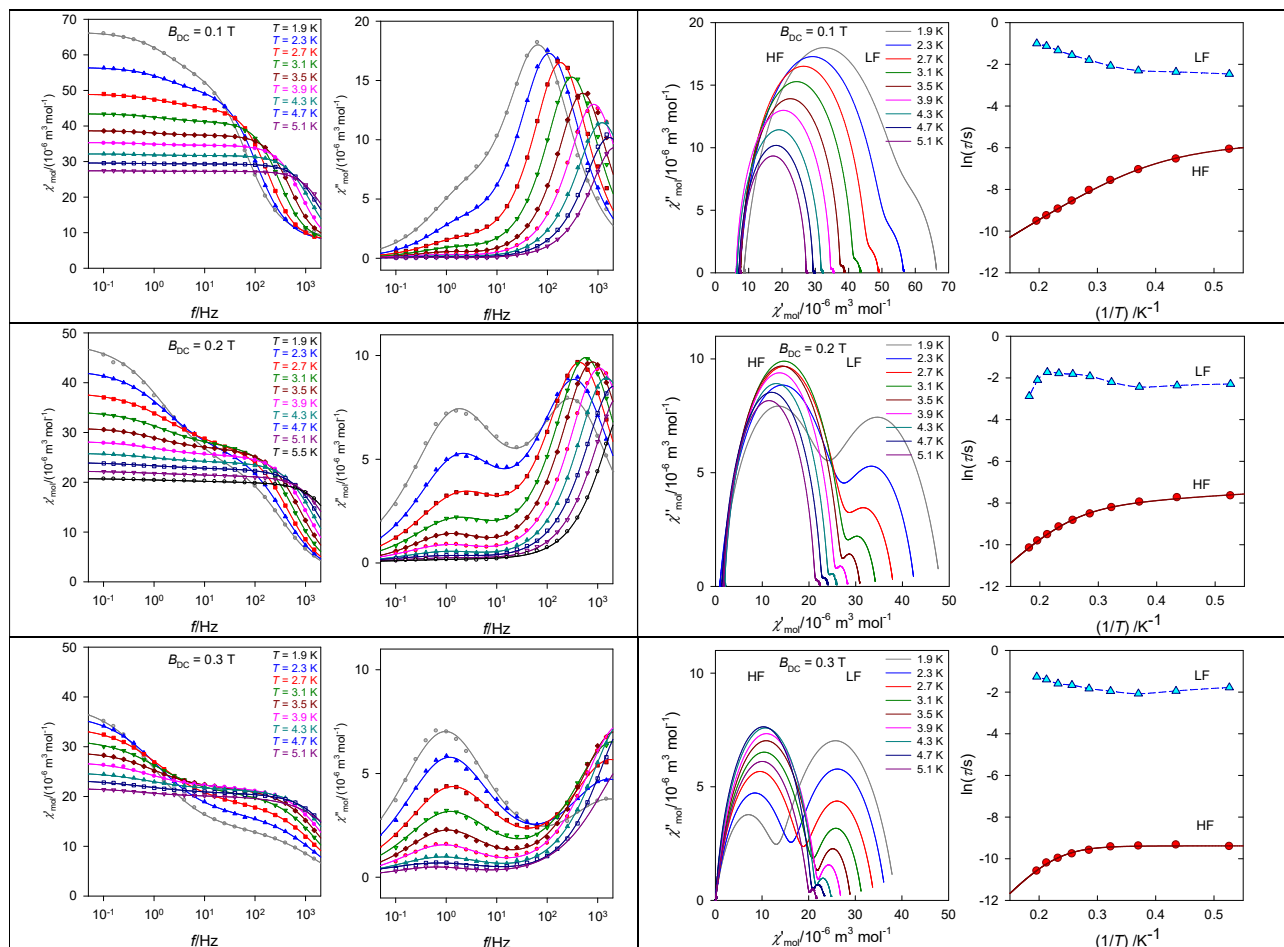

**Fig. S3** Comparison of AC susceptibility data for **1** at different external magnetic field. Some trends:

- With increasing DC field the adiabatic susceptibility decreases (for  $B_{\text{DC}} = 0.3$  it was fixed to  $\chi_s = 0$ ).
- With increasing DC-field the height of the LF peak increases.
- With increasing DC-field the HF peak moves to higher frequencies (and outside the hardware limit) so that the corresponding relaxation times are shorter.
- With increasing DC-field the slope of the Arrhenius-like plot decreases and the  $\ln \tau$  vs  $T^{-1}$  curve becomes more flat (temperature independent).
- With increasing temperature the maximum of the LF peak moves to lower frequencies that causes that the corresponding relaxation time increases (unusual behaviour).
- With increasing temperature the height of the LF peak disappears.

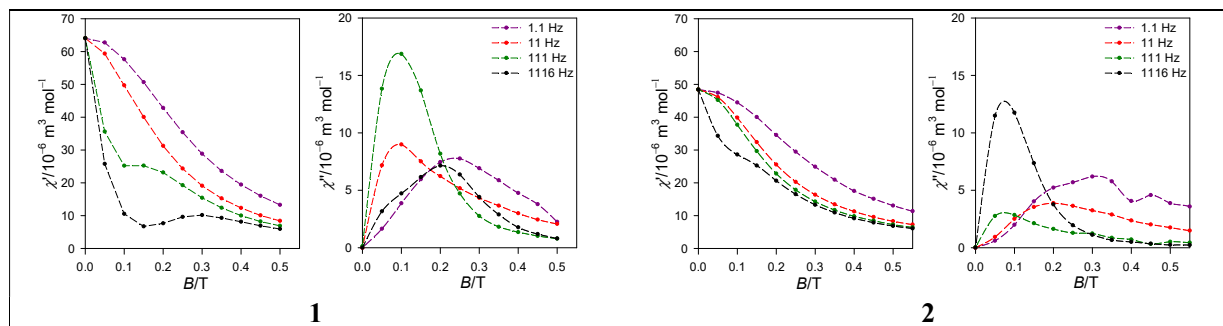

**Fig. S4** Comparison of the field dependence of the AC susceptibility components for a set of frequencies at  $T = 2.0$  K

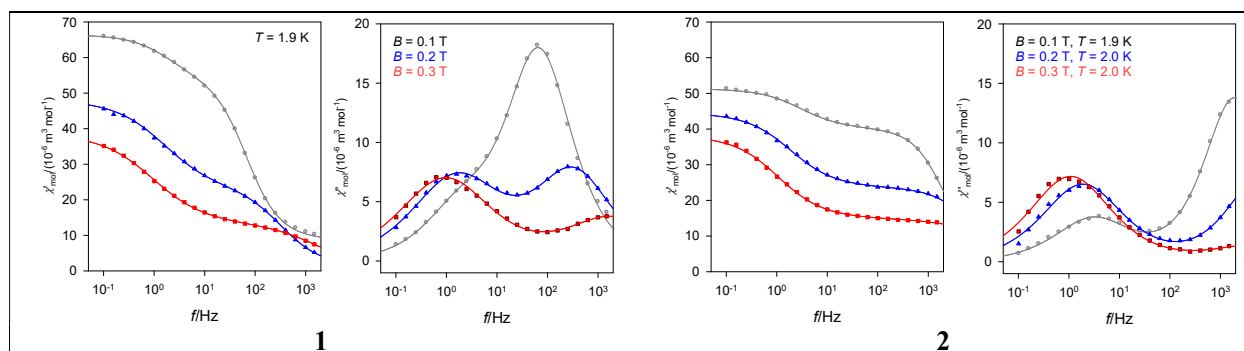

**Fig. S5** Comparison of the frequency dependence of the AC susceptibility components for a set of external fields at  $T = 1.9$  and/or  $2.0$  K.

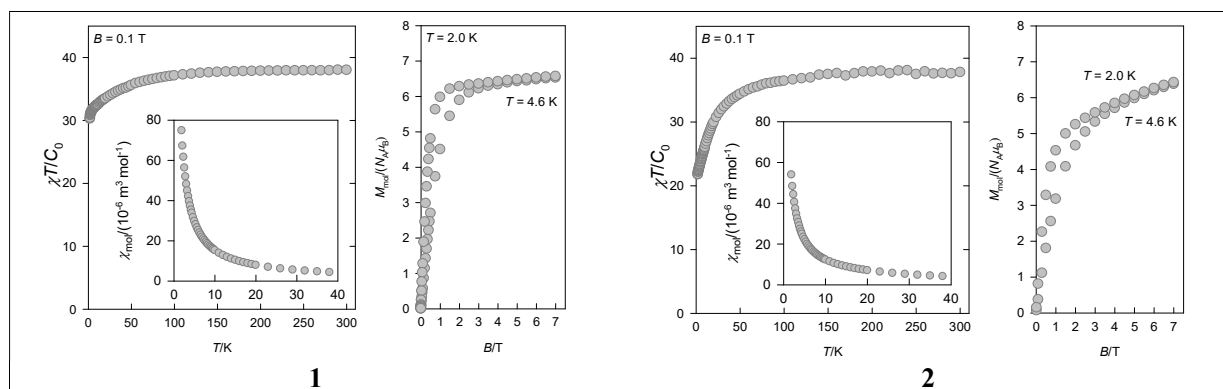

**Fig. S6** Comparison of DC magnetic data for 1 and 2.

**Table S5** Crystallographic data of **1** and **2**.

|                                         | <b>1</b>                                                       | <b>2</b>                                                       |
|-----------------------------------------|----------------------------------------------------------------|----------------------------------------------------------------|
| Formula                                 | $\text{C}_{22}\text{H}_{24}\text{N}_2\text{O}_{14}\text{CoDy}$ | $\text{C}_{24}\text{H}_{28}\text{N}_4\text{O}_{14}\text{CoDy}$ |
| FW                                      | 789.88                                                         | 817.93                                                         |
| Crystal system                          | Monoclinic                                                     | Monoclinic                                                     |
| Space group                             | $P21/n$                                                        | $P21/n$                                                        |
| $a/\text{Å}$                            | 10.7189(9)                                                     | 11.029(2)                                                      |
| $b/\text{Å}$                            | 15.8478(14)                                                    | 14.281(3)                                                      |
| $c/\text{Å}$                            | 16.4828(15)                                                    | 18.943(4)                                                      |
| $\beta/^\circ$                          | 98.315(3)                                                      | 96.809(7)                                                      |
| $V/\text{Å}^3$                          | 2770.5 (4)                                                     | 2962.6(10)                                                     |
| $Z$                                     | 4                                                              | 4                                                              |
| $T/\text{K}$                            | 303(2)                                                         | 303(2)                                                         |
| $\theta/^\circ$                         | 2.437 – 30.607                                                 | 2.344 – 25.773                                                 |
| $\mu$ (Mo $K\alpha$ )/ $\text{mm}^{-1}$ | 3.351                                                          | 3.137                                                          |
| $D_{\text{calcd}}/\text{g cm}^{-3}$     | 1.894                                                          | 1.834                                                          |
| $F(000)$                                | 1556                                                           | 1620                                                           |
| Index ranges                            | $-15 < h < 15$<br>$-22 < k < 20$<br>$-23 < l < 23$             | $-13 < h < 13$<br>$-16 < k < 17$<br>$-23 < l < 23$             |
| Rfs. collected                          | 77261                                                          | 65720                                                          |
| Rfs. unique/observed                    | 7180 / 8505                                                    | 4186 / 5656                                                    |
| $R_{\text{int}}$                        | 0.0293                                                         | 0.1148                                                         |
| $R_1^a/wR_2^b$ [ $I > 2\sigma(I)$ ]     | 0.0235/0.0488                                                  | 0.0317/0.0515                                                  |
| $R_1^a/wR_2^b$ [for all $F_o^2$ ]       | 0.0342/0.0529                                                  | 0.0610/0.0582                                                  |
| GOF on $F^2$                            | 1.077                                                          | 1.034                                                          |
